# Supplementary material for: Dye-sensitized solar cells based on highly catalytic CNTs/Ti 3 C 2 T x MXenes composite counter electrode
Source: Royal Society of Chemistry journal article supplement (doi:10.1039/d3ra06814e), 2023-01-01
Supplement: d3ra06814e1.pdf [file d3ra06814e1.pdf]

## Supporting Information

### **Dye-sensitized Solar Cells Based on Highly Catalytic CNTs/Ti<sub>3</sub>C<sub>2</sub>T<sub>x</sub> MXenes Composite Counter Electrode**

Zishan Hu<sup>a</sup>, Yuanlin Li<sup>a</sup>, Aijun Li<sup>a,\*</sup>, Hai-Hua Wang<sup>a,\*</sup>, and Xiao-Feng Wang<sup>a,\*</sup>

*<sup>a</sup> Key Laboratory of Physics and Technology for Advanced Batteries (Ministry of Education), College of Physics, Jilin University, Changchun 130012, P. R. China*

E-mail: laj@jlu.edu.cn (Aijun Li); haihua@jlu.edu.cn (Hai-Hua Wang);

xf\_wang@jlu.edu.cn (Xiao-Feng Wang)

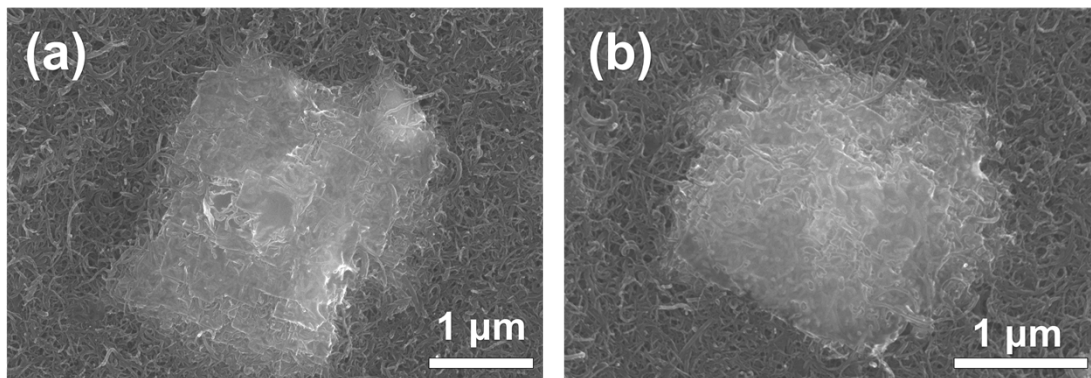

**Fig. S1.** SEM images of C/T-1.0wt% CE.

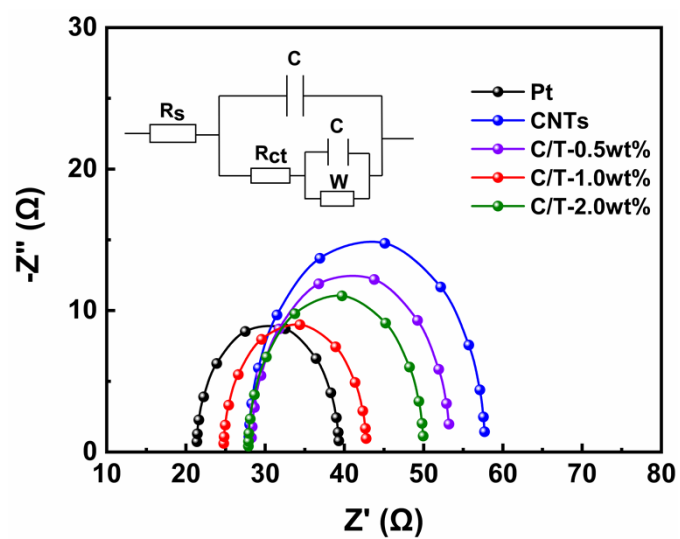

**Fig. S2.** EIS of the DSSCs based on the different CEs.<sup>S1</sup>

**Table S1** The EIS of DSSCs with various CEs.

| CE          | $R_s$<br>( $\Omega$ ) | $R_{ct}$<br>( $\Omega$ ) |
|-------------|-----------------------|--------------------------|
| Pt          | 21.35                 | 17.98                    |
| CNTs        | 27.91                 | 29.85                    |
| C/T-0.5 wt% | 28.24                 | 25.12                    |
| C/T-1.0 wt% | 24.76                 | 18.04                    |
| C/T-2.0 wt% | 27.87                 | 22.12                    |

## References

S1 Y. Du, G. Yue, Y. Gao, C. Dong, R. Liu, J. Huo, F. Tan, *Sol. Energy*, 2021, **227**, 78–88.
